# Supplementary material
Source: PubMed Central journal article supplement (PMC6697584)
Supplement: NIHMS1529830-supplement-3.pdf [file NIHMS1529830-supplement-3.pdf]

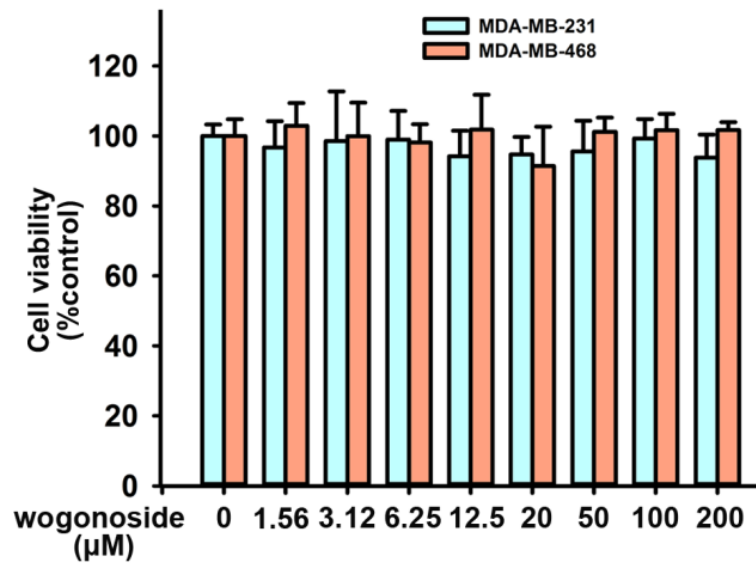

**Figure S1 (Related to Figure 2).** Effects of wogonoside on the viability of MDA-MB-231 and MDA-MB-468 cell lines were examined by MTT assay. Cells were treated with various concentrations of wogonoside (0, 25, 50 and 100 μM) for 24 h. Data are presented as mean  $\pm$  SD.

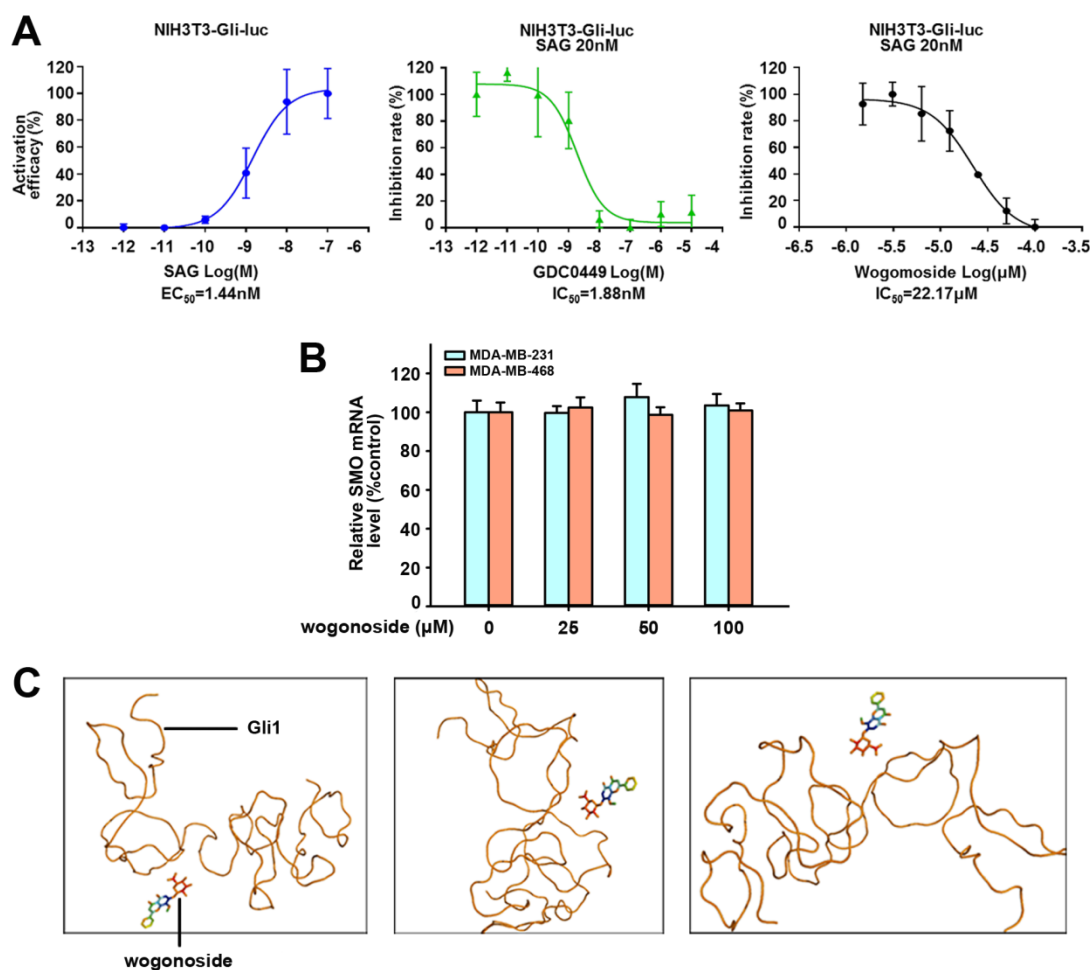

**Figure S2 (Related to Figures 3 and 5). Effect of wogonoside on Gli and SMO.**

(A) Effect of wogonoside on the transcription activity of Gli was detected by Gli-luciferase reporter assay. NIH3T3 cells were transfected with 8 x Gli firefly luciferase reporter plasmid, then maintained in DMEM medium with 0.5% FBS and different concentrations of wogonoside in the presence of SAG (20 nM) as indicated. Data were analyzed by GraphPad Prism 7 software (GraphPad, La Jolla, CA). Results are representative of three independent experiments. (B) The mRNA level of SMO was investigated by RT-PCR. MDA-MB-231 or MDA-MB-468 cells pretreated with wogonoside (0, 25, 50 and 100 μM) for 24 h as indicated. Data are presented as mean ± SD. (C) The binding mode of wogonoside with Gli1 was shown according to the molecular docking simulation. Molecular docking simulation didn't show a significant interaction between wogonoside with Gli1. Results are representative of three independent experiments.

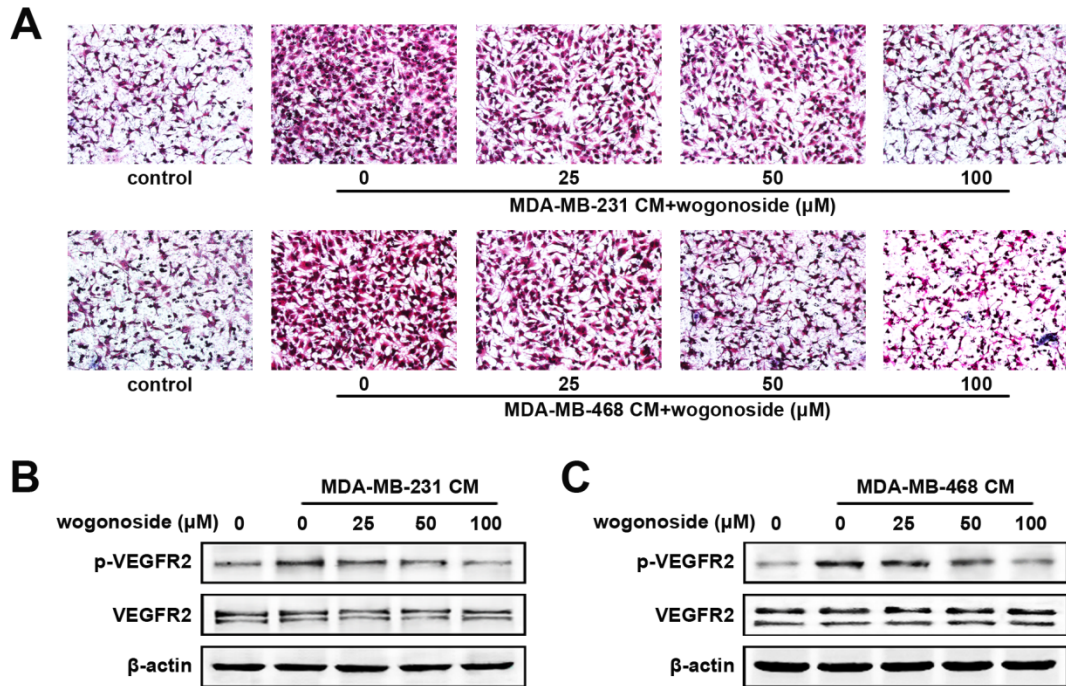

**Figure S3 (Related to Figure 6). Effect of wogonoside on the invasion and protein expression of endothelial cells.**

MDA-MB-231 or MDA-MB-468 cells ( $5 \times 10^6$  cells/culture flask) pretreated with wogonoside (0, 25, 50 and 100  $\mu\text{M}$ ) for 24 h were cultured for another 12 h with low serum media containing 1% FBS, and then the condition medium (MDA-MB-231 or MDA-MB-468 CM) was collected. The human umbilical vein endothelial cells (HUVECs) were stimulated with CM or 1% FBS medium in control group. **(A)** Effect of wogonoside on HUVECs invasion induced by MDA-MB-231 or MDA-MB-468 CM as indicated was tested by endothelial cell invasion assay. **(B)** Effect of conditioned media (CM) on VEGFR2 and p-VEGFR2 expression in HUVECs was detected by Western blot assay. Results are representative of three independent experiments.

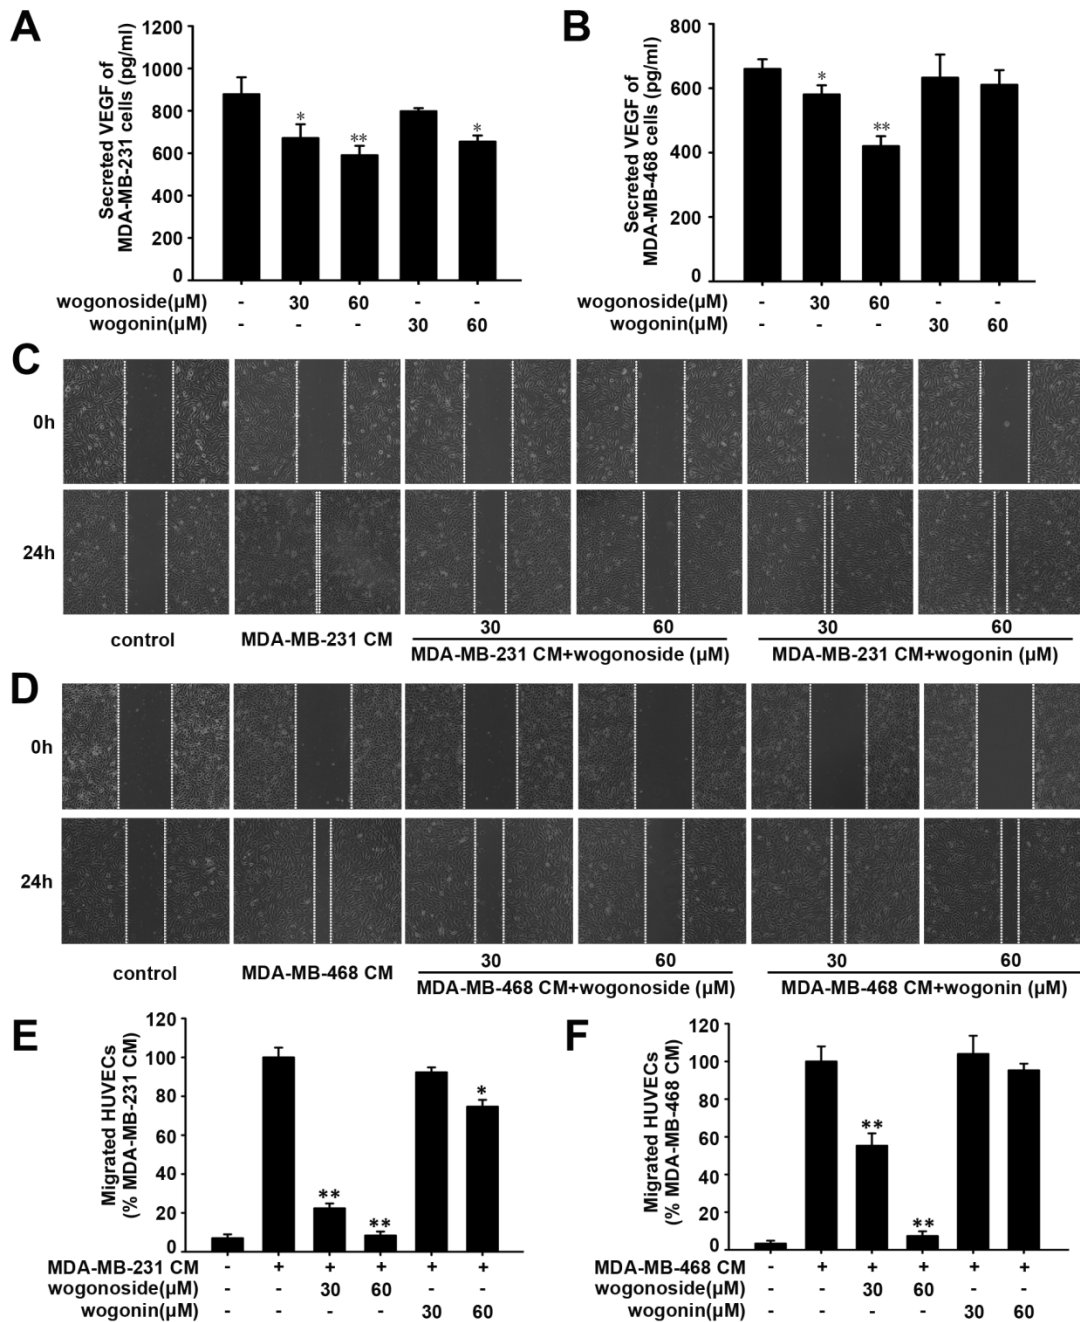

**Figure S4 (Related to Figure 7). Effects of wogonoside and wogonin on VEGF secretion and endothelial cell migration.**

After MDA-MB-231 or MDA-MB-468 cells were treated with wogonoside or wogonin (30 and 60  $\mu$ M) for 24 h, the supernatant was collected and referred to as TNBC cell derived conditioned medium (MDA-MB-231 CM or MDA-MB-468 CM), then VEGF concentration in the conditioned medium was measured by ELISA kits. **(A)** Effect of wogonoside and wogonin on VEGF secretion of

MDA-MB-231 cells. **(B)** Effect of wogonoside and wogonin on VEGF secretion of MDA-MB-468 cells. The wound-healing assay and the conditional cell culture system were established to evaluate the effect of compounds on angiogenesis in TNBC cells. In the wound-healing assay, human umbilical vein endothelial cells (HUVECs) were stimulated with MDA-MB-231 CM or MDA-MB-468 CM. **(C)** Effect of wogonoside and wogonin on MDA-MB-231 CM-induced HUVECs migration tested by wound healing assay. **(D)** Effect of wogonoside and wogonin on MDA-MB-468 CM-induced HUVECs migration tested by wound-healing assay. **(E-F)** Wound healing was quantified by measuring the migrated distance of HUVECs. Data are presented as mean  $\pm$  SD. The comparisons were made relative to MDA-MB-231 or MDA-MB-468 CM group and significance of difference is indicated as \**P* value < 0.05 and \*\**P* value < 0.01.

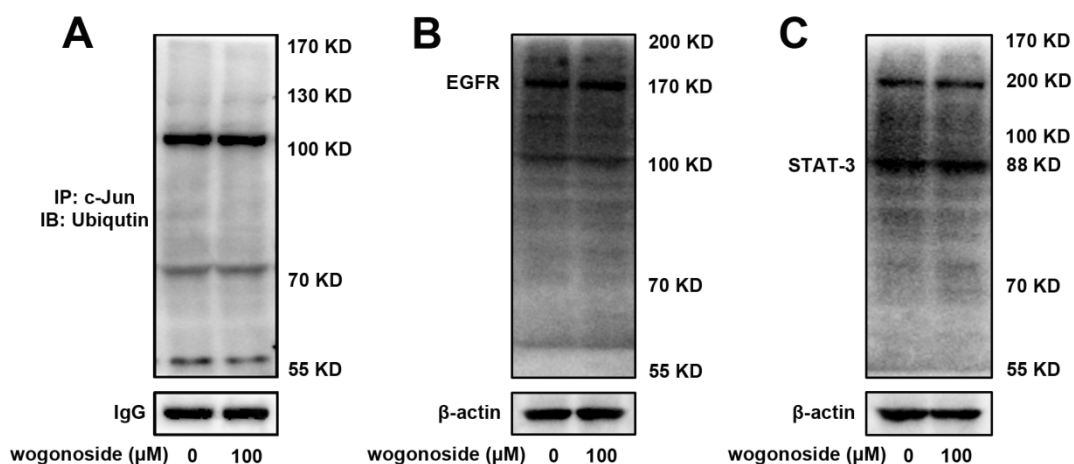

**Figure S5 (Related to Figure 5). Effects of wogonoside on the ubiquitination level of c-Jun, EGFR and STAT-3.**

MDA-MB-231 cells were treated by wogonoside (100 μM) for 24 h. **(A)** c-Jun ubiquitination was determined by protein immunoprecipitation assay. c-Jun protein of MDA-MB-231 cells was immunoprecipitated and detected by ubiquitin antibody using western blotting. **(B)** The ubiquitination level of EGFR was detected with specific antibodies by Western Blot Analysis. **(C)** The ubiquitination level of STAT-3 was detected with specific antibodies by Western Blot Analysis. Results are representative of three independent experiments.
